# Supplementary material for: A randomized controlled non-inferiority trial of placebo versus macrolide antibiotics for Mycoplasma pneumoniae infection in children with community-acquired pneumonia: trial protocol for the MYTHIC Study
Source: Springer Nature journal article supplement (doi:10.1186/s13063-024-08438-6), 2024-10-03
Supplement: MOESM2 [file 13063_2024_8438_MOESM2_ESM.pdf]

## Additional file 2

**Table.** Information about participating sites.

| No. | Participating site                                                                                 | Address                                                                                                                                                      |
|-----|----------------------------------------------------------------------------------------------------|--------------------------------------------------------------------------------------------------------------------------------------------------------------|
| 1   | University Children's Hospital Zurich, Switzerland                                                 | Universitäts-Kinderspital Zürich<br>Steinwiesstrasse 75<br>CH-8032 Zürich                                                                                    |
| 2   | Department of Pediatrics, Triemli Hospital Zurich, Switzerland                                     | Kinderklinik<br>Stadtspital Zürich Triemli<br>Birmensdorferstrasse 497<br>CH-8063 Zürich                                                                     |
| 3   | Department of Pediatrics, Cantonal Hospital Winterthur, Switzerland                                | Klinik für Kinder- und Jugendliche<br>Kantonsspital Winterthur<br>Braucherstrasse 15<br>Postfach<br>CH-8401 Winterthur                                       |
| 4   | University of Basel Children's Hospital, Switzerland                                               | Universitäts-Kinderspital beider Basel (UKBB)<br>Spitalstrasse 33<br>CH-4056 Basel                                                                           |
| 5   | Children's Hospital of Eastern Switzerland St. Gallen                                              | Ostschweizer Kinderspital<br>Claudiusstrasse 6<br>CH-9006 St. Gallen                                                                                         |
| 6   | Department of Pediatrics, Cantonal Hospital Graubünden, Switzerland                                | Kantonsspital Graubünden<br>Departement Kinder- und Jugendmedizin<br>Loëstrasse 170<br>CH-7000 Chur                                                          |
| 7   | Children's Hospital of Central Switzerland, Switzerland                                            | Kinderspital Zentralschweiz<br>Kinder- und Jugendnotfallzentrum<br>Spitalstrasse<br>CH-6000 Luzern 16                                                        |
| 8   | Children's Hospital Aarau, Switzerland                                                             | Kantonsspital Aarau<br>Kinderspital<br>Haus 9<br>Tellstrasse 25<br>CH-5001 Aarau                                                                             |
| 9   | University Children's Hospital Bern, Switzerland                                                   | Kinderklinik<br>Inselspital<br>Universitätsspital Bern<br>Freiburgstrasse<br>CH-3010 Bern                                                                    |
| 10  | Children's Hospital of Geneva, University Hospitals of Geneva, Switzerland                         | Hôpital des enfants<br>Hôpitaux Universitaires Genève<br>Rue Willy-Donzé 6<br>CH-1205 Genève                                                                 |
| 11  | Department of Pediatrics, Department Mother-Woman-Child, Lausanne University Hospital, Switzerland | Hôpital de l'enfance de Lausanne<br>Département femme-mère-enfant<br>Centre hospitalier universitaire vaudois (CHUV)<br>Rue du Bugnon 21<br>CH-1011 Lausanne |
| 12  | Department of Pediatrics, Fribourg Hospital, Switzerland                                           | Pédiatrie<br>HFR Freiburg – Kantonsspital<br>Postfach<br>CH-1708 Freiburg                                                                                    |
| 13  | Institute of Pediatrics of Southern Switzerland, EOC, Bellinzona, Switzerland                      | Istituto Pediatrico della Svizzera Italiana<br>Ospedale San Giovanni<br>Via Athos Gallino 12<br>CH-6500 Bellinzona                                           |
