# Supplementary material for: A randomized controlled non-inferiority trial of placebo versus macrolide antibiotics for Mycoplasma pneumoniae infection in children with community-acquired pneumonia: trial protocol for the MYTHIC Study
Source: Springer Nature journal article supplement (doi:10.1186/s13063-024-08438-6), 2024-10-03
Supplement: MOESM3 [file 13063_2024_8438_MOESM3_ESM.pdf]

### Additional file 3

**Figure.** *Mycoplasma pneumoniae*-specific IgM lateral flow assay (LFA) test results. (Left) Illustrative examples of positive, negative, and invalid test results. “S”, sample application window; “T”, blue test line; “C”, red control line (prerequisite for a valid test). (Right) Representative examples show test results for different gradings. Figure adapted from Meyer Sauter et al. [1].

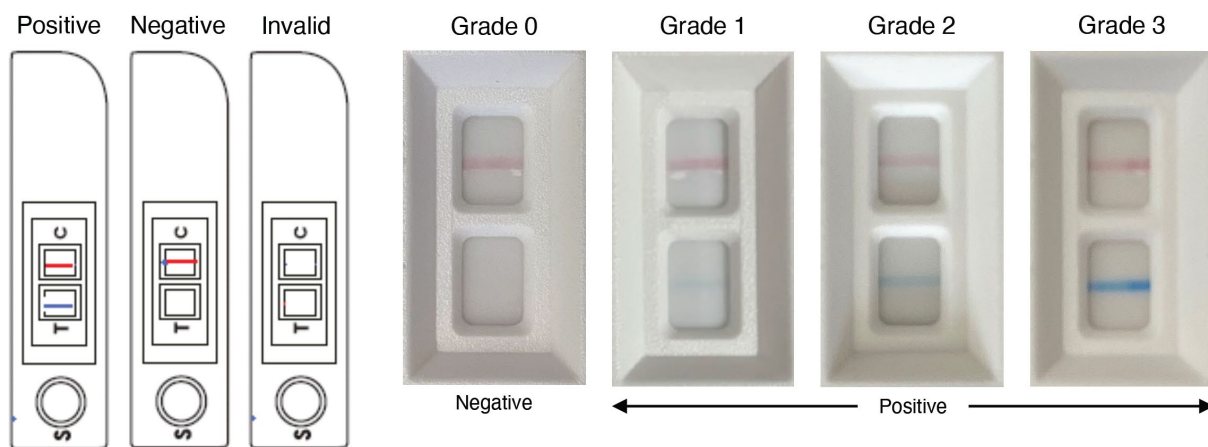

**Table.** Diagnostic performance of the *Mycoplasma pneumoniae*-specific IgM lateral flow assay compared to PCR as reference test. Abbreviations: CI, confidence interval; CAP, community-acquired pneumonia; DOR, diagnostic odds ratio; LFA, lateral flow assay; LR+, positive likelihood ratio; LR-, negative likelihood ratio; PCR, polymerase chain reaction.

| Cohort (n=125)                                                                   | Characteristics                                                                                                                                                                  | Reference test | Screening test          |                         | Performance                                                                                                                                                                               |
|----------------------------------------------------------------------------------|----------------------------------------------------------------------------------------------------------------------------------------------------------------------------------|----------------|-------------------------|-------------------------|-------------------------------------------------------------------------------------------------------------------------------------------------------------------------------------------|
|                                                                                  |                                                                                                                                                                                  | PCR            | IgM LFA                 |                         |                                                                                                                                                                                           |
|                                                                                  |                                                                                                                                                                                  |                | Positive (grade 2 or 3) | Negative (grade 0 or 1) |                                                                                                                                                                                           |
| myCAP study [1] (n=94)<br>and<br>KIDS-STEP study [2] (n=31, unpublished results) | <ul style="list-style-type: none"> <li>• CAP clinically diagnosed</li> <li>• Age 3–17 years</li> <li>• Inpatients or outpatients</li> <li>• Previous healthy children</li> </ul> | Positive       | 37 (29.6%)              | 6 (4.8%)                | Sensitivity: 86.0% (95% CI 72.7%–93.4%)<br>Specificity: 95.1% (95% CI 88.1%–98.1%)<br>LR+: 17.64 (95% CI 6.73–46.22)<br>LR-: 0.15 (95% CI 0.07–0.31)<br>DOR: 120.25 (95% CI 31.99–452.07) |
|                                                                                  |                                                                                                                                                                                  | Negative       | 4 (3.2%)                | 78 (62.4%)              |                                                                                                                                                                                           |

## References

1. Meyer Sauter PM, Panisova E, Bachmann LM, Ambroggio L, Berger C. Evaluation of IgM lateral flow assay as screening tool for *Mycoplasma pneumoniae* infection in childhood pneumonia. J Clin Microbiol. 2020;58:e01498-20.
2. Kohns Vasconcelos M, Meyer Sauter PM, Santoro R, Coslovsky M, Lura M, Keitel K, et al. Randomised placebo-controlled multicentre effectiveness trial of adjunct betamethasone therapy in hospitalised children with community-acquired pneumonia: a trial protocol for the KIDS-STEP trial. BMJ Open. 2020;10:e041937.
